# Supplementary material for: Enantioselective Raman spectroscopy (esR) for distinguishing between the enantiomers of 2-butanol
Source: Royal Society of Chemistry journal article supplement (doi:10.1039/c8an00705e), 2018-01-01
Supplement: c8an00705e1.pdf [file c8an00705e1.pdf]

Supplementary Information

**Enantioselective Raman spectroscopy (esR) for distinguishing between the enantiomers of  
2-butanol**

Claudia C. Rullich<sup>1</sup> and Johannes Kiefer<sup>1,2\*</sup>

<sup>1</sup>University of Bremen, Technische Thermodynamik, Badgasteiner Str. 1, 28359 Bremen,  
Germany.

<sup>2</sup>University of Bremen, MAPEX Center for Materials and Processes, 28359 Bremen, Germany.

Corresponding author. Phone: +49 421 218 64777. Email: [jkiefer@uni-bremen.de](mailto:jkiefer@uni-bremen.de)

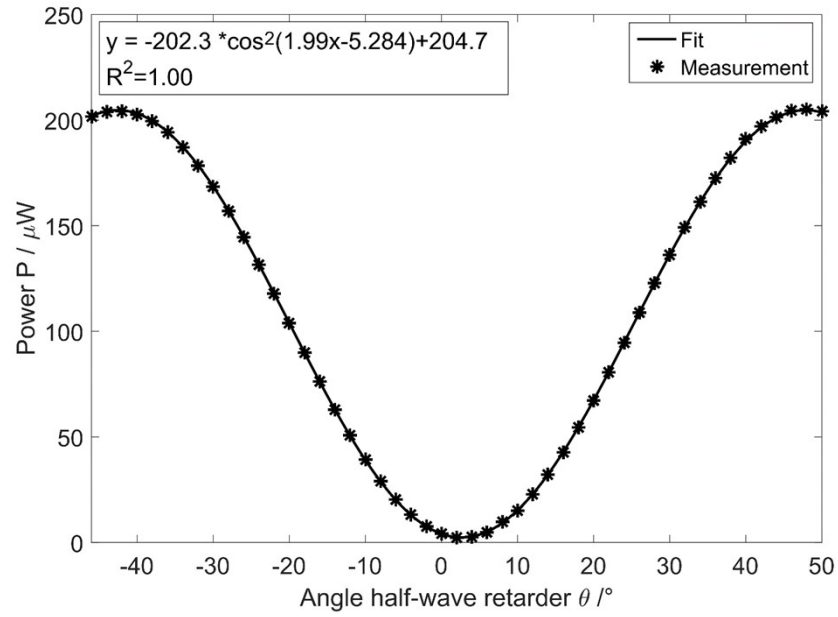

**Figure S1.** Calibration of orientation of half-wave Fresnel rhombus with a polarimeter set-up by fitting the measured values according to malus's law. The angular orientation at the intensity minimum (measured as power) is taken as  $0.0^\circ$  for the plane of incidence.

**Table S1. Peak assignment of observed Raman peak positions and of observed ATR-IR peak positions of 2-Butanol in  $\text{cm}^{-1}$  (sh = shoulder, str. = stretching, def. = deformation, sciss. = scissoring, rock. = rocking, wagg. = wagging, tors. = torsion, s = symmetric, as = asymmetric).**

| Raman wavenumber / $\text{cm}^{-1}$ | IR wavenumber / $\text{cm}^{-1}$ | Assignment                                      | Reference |
|-------------------------------------|----------------------------------|-------------------------------------------------|-----------|
| 407                                 |                                  | skeletal                                        | 1         |
| 425 (sh)                            |                                  | skeletal                                        | 1         |
| 456                                 |                                  | CCO def.,<br>CCC def.                           | 2         |
| 518                                 |                                  | CCO def.,<br>CCC def.                           | 2         |
| 777                                 | 776                              | $\text{CH}_2$ rock.                             | 2         |
| 794 (sh)                            | 794 (sh)                         | CC str.                                         | 2         |
| 821                                 | 821                              | $(\text{C})_2\text{C-O}$ s str.                 | 3         |
| 840 (sh)                            |                                  | $\text{CH}_2$ rock.,<br>$\text{CH}_3$ rock.     | 2         |
| 908                                 | 911                              | CC str., $\text{CH}_3$<br>rock.                 | 2         |
| 971 (sh)                            | 968                              | -                                               |           |
| 984                                 | 991                              | CC s str.,<br>$\text{CH}_3$ rock.,<br>CO s str. | 2         |
| 1023                                | 1031                             | CCO s str.,<br>$\text{CH}_2$ tors.              | 2, 4      |
| 1045 (sh)                           |                                  | CC str.                                         | 2         |
| 1097                                | 1109                             | CCO as str.,<br>$\text{CH}_3$ rock.             | 3         |
| 1114 (sh)                           | 1120 (sh)                        | CCO as str.,<br>$\text{CH}_2$ rock.             | 3         |
| 1145                                | 1148                             | $\text{CH}_2$ rock.                             | 2         |
| 1166                                | 1155 (sh)                        | $\text{CH}_2$ rock.                             | 2         |
| 1244                                | 1254                             | $\text{CH}_2$ wagg.,<br>COH def.                | 2         |
| 1282                                |                                  | $\text{CH}_2$ wagg.,<br>COH def.                | 2         |
|                                     | 1300                             | $\text{CH}_2$ wagg.,<br>COH def.                | 2         |
|                                     | 1326                             | CH sciss.                                       | 3         |
| 1338                                |                                  | CH sciss..                                      | 3         |
| 1359                                |                                  | CH sciss.                                       | 3         |
|                                     | 1375                             | $\text{CH}_3$ s def.                            | 2         |
| 1396                                |                                  | $\text{CH}_2$ sciss.                            | 2         |

|      |           |                                                      |              |
|------|-----------|------------------------------------------------------|--------------|
|      | 1415      | CH <sub>2</sub> sciss.                               | <sup>2</sup> |
| 1433 |           | CH <sub>3</sub> as sciss.,<br>CH <sub>2</sub> sciss. | <sup>3</sup> |
|      | 1458      | CH <sub>3</sub> as sciss.<br>CH <sub>2</sub> sciss.  | <sup>3</sup> |
| 2721 |           | Combination                                          | <sup>2</sup> |
|      | 2861 (sh) | Overtone                                             | <sup>2</sup> |
| 2876 | 2881      | CH <sub>2</sub> s str                                | <sup>2</sup> |
| 2887 |           | CH <sub>3</sub> s str                                | <sup>2</sup> |
|      | 2929      | CH <sub>3</sub> s str                                | <sup>2</sup> |
| 2933 | 2934 (sh) | CH <sub>3</sub> s str                                | <sup>2</sup> |
| 2967 | 2969      | CH <sub>2</sub> as str.<br>CH <sub>3</sub> as str.   | <sup>2</sup> |
| 3352 | 3344      | OH str.                                              | <sup>2</sup> |

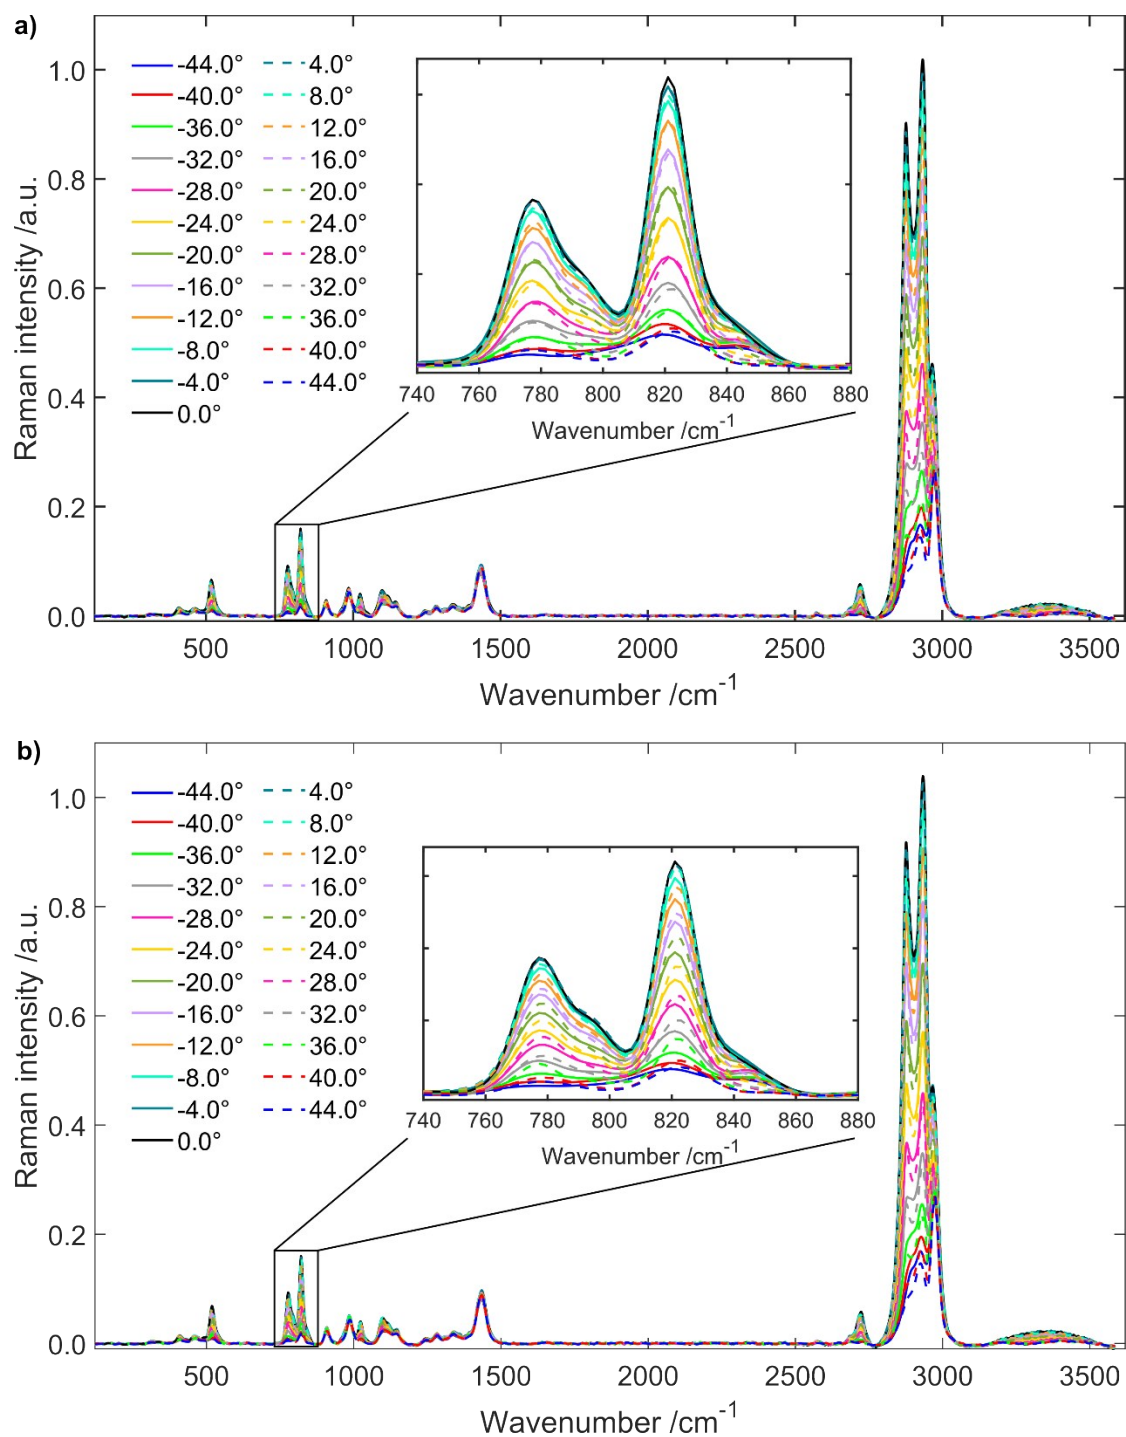

**Figure S2. Retarder angle-resolved Raman spectra of (R)-(-)-2-butanol (a) and (S)-(+)-2-butanol (b) with  $-44.0^\circ \leq \theta \leq +44.0^\circ$  in steps of  $4.0^\circ$ . The highlighted region around  $800 \text{ cm}^{-1}$  contains the symmetric  $(\text{C})_2\text{C-O}$  stretching vibration.**

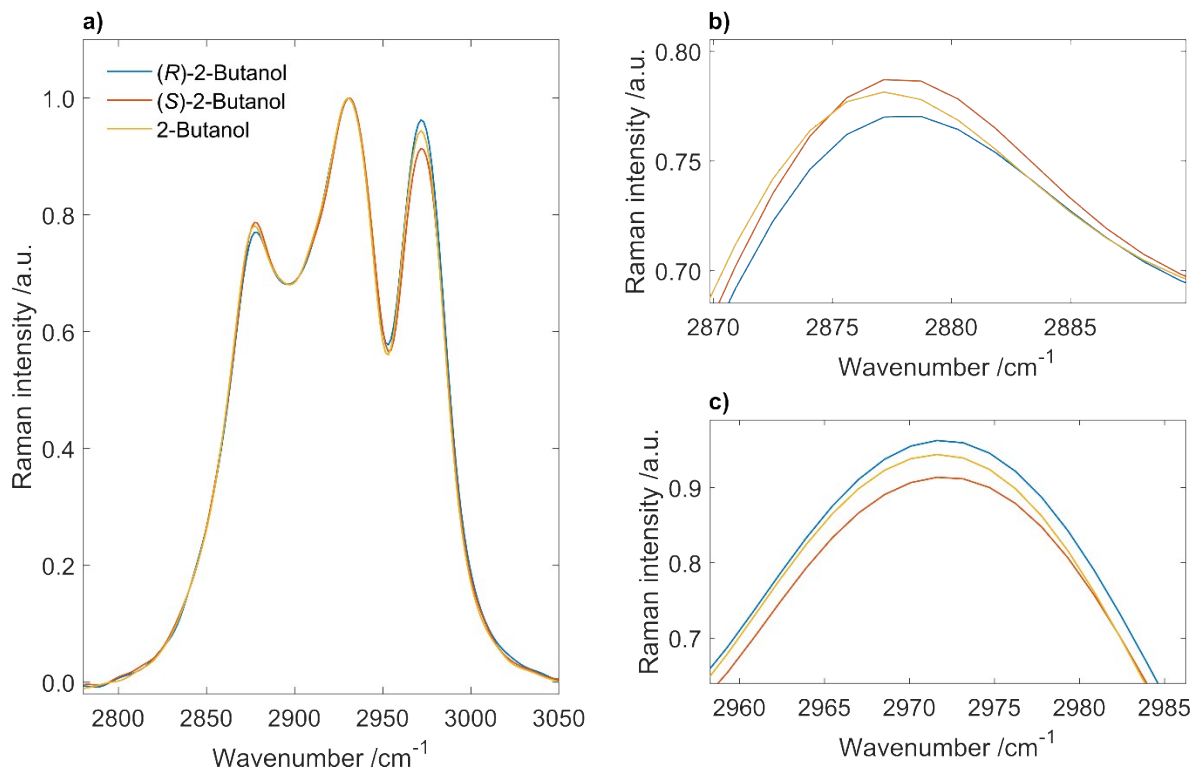

**Figure S3. Enlarged Raman spectra of  $\text{CH}_2$  and  $\text{CH}_3$ -stretching vibrations (a), symmetric  $\text{CH}_2$  and  $\text{CH}_3$  stretching vibrations (b), asymmetric  $\text{CH}_3$  stretching vibration (c)): Spectra were recorded with vertically polarized incident laser light, of (R)-(-)-2-butanol, (S)-(+)-2-butanol, and 2-butanol with  $\theta = +32.0^\circ$ . The full spectrum of each substance was normalized with respect to its strongest peak.**

## References

1. G. Socrates, *Infrared and Raman Characteristic Group Frequencies: Tables and Charts*, John Wiley & Sons Ltd, Chichester, third edn., 2001.
2. J. Kiefer, S. Wagenfeld and D. Kerlé, *Spectrochim. Acta, Part A*, 2018, **189**, 57-65.
3. P. Larkin, *Infrared and Raman Spectroscopy: Principles and Spectral Interpretation*, Elsevier, Oxford, 2011.
4. S. L. Joa and J. E. Pemberton, *Langmuir*, 1992, **8**, 2301-2310.
